# Supplementary material
Source: publisher site journal article supplement (https://www.dovepress.com/article/219578)
Supplement: Supplementary file 1 [file get_supplementary_file.php]

Supplementary information

cRGDfK-grafted small-size quercetin micelles for enhancing therapy efficacy of active ingredient from the Chinese medicinal herb

Pengcheng Xu1, Haisheng Wan3, Hongxiang Hu2, Yong Ye4, Yu Dong1, Suxin Li2, Dong Mei2, Zhaoming Guo2, Dan Wang2, Yanxue Sun1, Tengfei Yu1, Junchan Qiao1 and Qiang Zhang2*

1.Department of pharmaceutical Engineering, College of Pharmacy, Inner Mongolia Medical University, Hohhot 010110, china.

2.Beijing Key Laboratory of Molecular Pharmaceutics and New Drug Delivery Systems, Department of pharmaceutics, School of Pharmaceutical Sciences, Peking University, Beijing 100191, China.

3.Department of Biochemistry, College of Basic Medical Sciences, Inner Mongolia Medical University, Hohhot 010110, china.

4. Department of pharmaceutics, College of Pharmacy, Guangxi Medical University, Nanning, 530021, China.


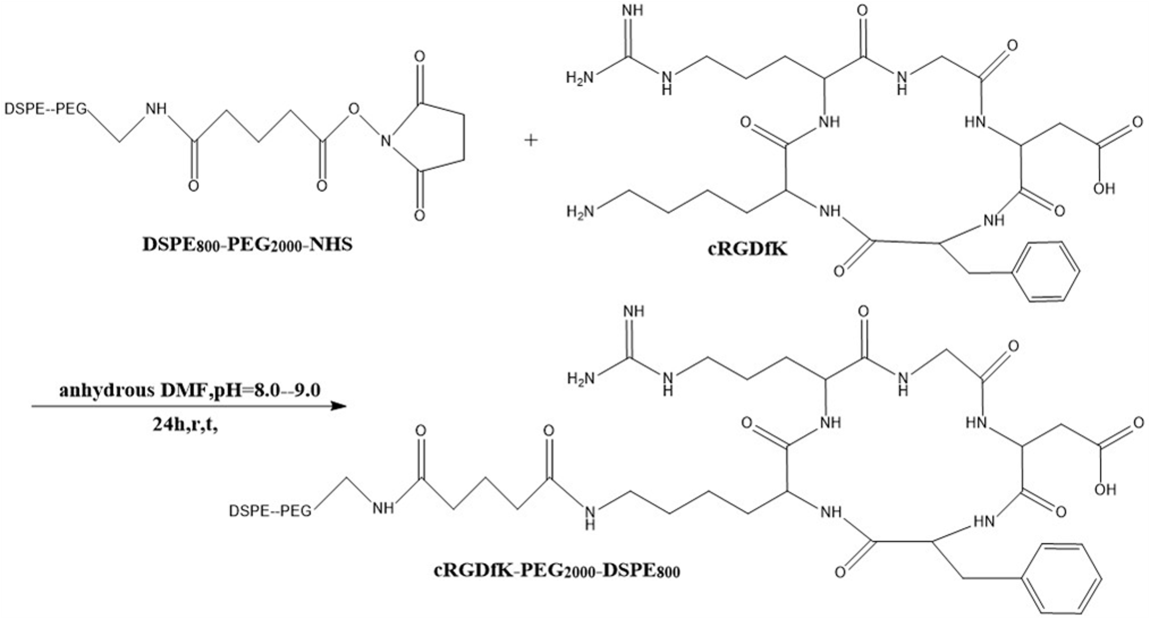


Fig S1.Synthesis scheme for cRGDfK-PEG-DSPE


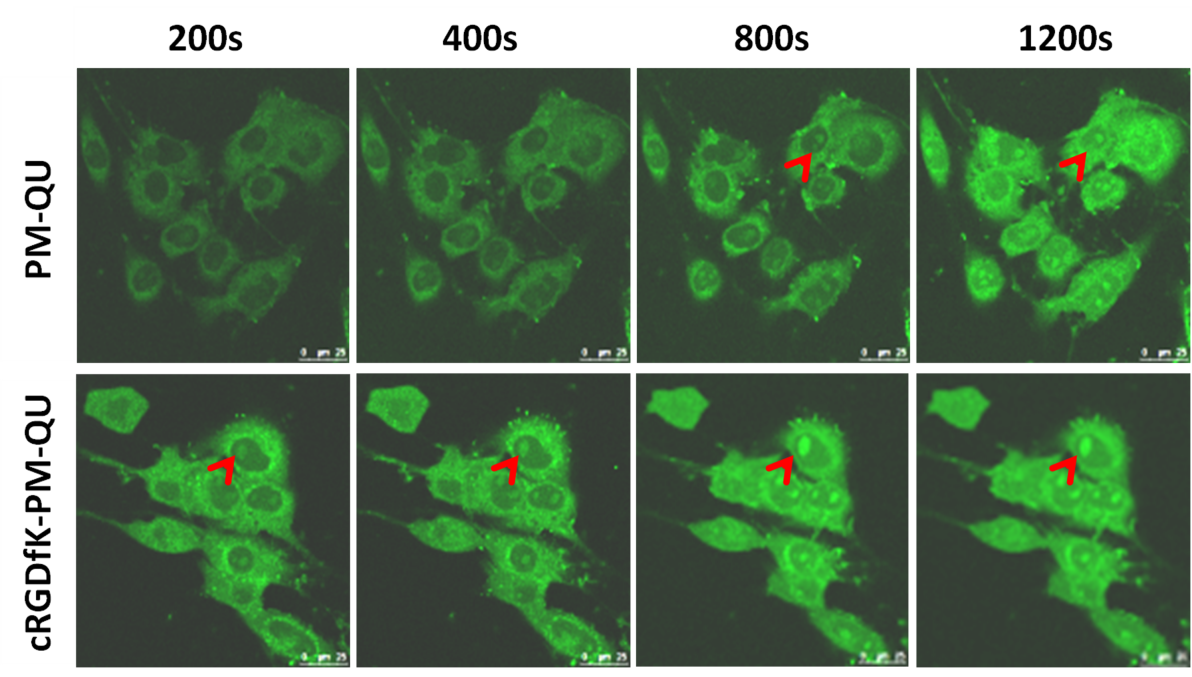


Fig S2. Quercetin distributed not only in the cytoplasm, but also in the nucleus (red arrow indicate that quercetin enter nucleolus)
